# Supplementary material
Source: PubMed Central journal article supplement (PMC6874636)
Supplement: 10616_2019_328_MOESM1_ESM.pdf [file 10616_2019_328_MOESM1_ESM.pdf]

Article title: Infant cardiosphere-derived cells exhibit non-durable heart protection in dilated cardiomyopathy rats

Journal name: Cytotechnology

Author names: Siyuan Wang, Weidan Chen, Li Ma, Minghui Zhou, Wenyan Dong, Haili Yang, Lei Sun, Xinxin Chen, Jinzhu Duan

Corresponding author: 1. Jinzhu Duan Heart center and institute of pediatrics, Guangzhou Women and Children's Medical Center, Guangzhou Medical University Tel: +86-20-38857729 E-Mail:duanjinzhu@163.com

2. Xinxin Chen Heart center, Guangzhou Women and Children's Medical Center, Guangzhou Medical University Tel: +86-20-38076172 E-Mail: zingerchen@163.com

Supplement Table 1. Clinical information of infant donors for CDCs isolation

| Sex   | Age (month) | Weight (kg) | Disease             | Source area               |
|-------|-------------|-------------|---------------------|---------------------------|
| male  | 5           | 8           | Tetralogy Of Fallot | Right Ventricular outflow |
| male  | 5           | 6.9         | Tetralogy Of Fallot | Right Ventricular outflow |
| male  | 5           | 7.2         | Tetralogy Of Fallot | Right Ventricular outflow |
| male  | 5           | 4.9         | Tetralogy Of Fallot | Right Ventricular outflow |
| male  | 6           | 6.2         | Tetralogy Of Fallot | Right Ventricular outflow |
| male  | 6           | 8.4         | Tetralogy Of Fallot | Right Ventricular outflow |
| male  | 8           | 7           | Tetralogy Of Fallot | Right Ventricular outflow |
| male  | 8           | 7           | Tetralogy Of Fallot | Right Ventricular outflow |
| male  | 8           | 6           | Tetralogy Of Fallot | Right Ventricular outflow |
| male  | 17          | 8.6         | Tetralogy Of Fallot | Right Ventricular outflow |
| male  | 18          | 8           | Tetralogy Of Fallot | Right Ventricular outflow |
| male  | 24          | 9.3         | Tetralogy Of Fallot | Right Ventricular outflow |
| male  | 24          | 10          | Tetralogy Of Fallot | Right Ventricular outflow |
| male  | 24          | 7.7         | Tetralogy Of Fallot | Right Ventricular outflow |
| male  | 12          | 8.2         | Tetralogy Of Fallot | Right Ventricular outflow |
| male  | 10          | 7.3         | Pulmonary Atresia   | Right Ventricular outflow |
| male  | 24          | 9.3         | Pulmonary Atresia   | Right Ventricular outflow |
| femal | 10          | 7.6         | Pulmonary Atresia   | Right Ventricular outflow |
| femal | 6           | 5.5         | Pulmonary Stenosis  | Right Ventricular outflow |
| femal | 9           | 6.3         | Pulmonary Stenosis  | Right Ventricular outflow |
| femal | 24          | 9.3         | Pulmonary Stenosis  | Right Ventricular outflow |
