# Supplementary material
Source: PubMed Central journal article supplement (PMC6874636)
Supplement: 10616_2019_328_MOESM2_ESM.pdf [file 10616_2019_328_MOESM2_ESM.pdf]

Article title: Infant cardiosphere-derived cells exhibit non-durable heart protection in dilated cardiomyopathy rats

Journal name: Cytotechnology

Author names: Siyuan Wang, Weidan Chen, Li Ma, Minghui Zhou, Wenyan Dong, Haili Yang, Lei Sun, Xinxin Chen, Jinzhu Duan

Corresponding author: 1. Jinzhu Duan Heart center and institute of pediatrics, Guangzhou Women and Children's Medical Center, Guangzhou Medical University Tel: +86-20-38857729 E-Mail:duanjinzhu@163.com

2. Xinxin Chen Heart center, Guangzhou Women and Children's Medical Center, Guangzhou Medical University Tel: +86-20-38076172 E-Mail: zingerchen@163.com

Supplement Table 2: CDCs isolated from patients of different ages

| Study(yr)                       | CDCs donor ages  |                 |               | CD105 <sup>+</sup> (%) | CD90 <sup>+</sup> (%) | CD117 <sup>+</sup> (%) |     |          | CD34 <sup>+</sup> (%) | CD45 <sup>+</sup> (%) | model/patient                          | efficacy                                         |
|---------------------------------|------------------|-----------------|---------------|------------------------|-----------------------|------------------------|-----|----------|-----------------------|-----------------------|----------------------------------------|--------------------------------------------------|
|                                 | <30days          | 1 month-2 years | (≥2-13) years |                        |                       | 9±3                    | 7±1 | 3±0.3    |                       |                       |                                        |                                                  |
| Rachana et al (2011)            |                  |                 |               | 81±3                   | 65±5                  |                        |     |          | N/A                   | N/A                   | rat,MI                                 | ↑function<br>myocardial regeneration             |
| Shuta et al (2015)              | <6 years         |                 |               | 99.7                   | 70.3                  | N/A                    |     |          | N/A                   | 0.1                   | child, Hypoplastic Left Heart Syndrome | ↑function                                        |
| Rachel Ruckdeschel et al (2007) | (31.4±1.6) years |                 |               | about 95               | about 37              | about 18               |     | about 10 |                       | about 0               | mice,MI                                | ↑function<br>myocardial regeneration             |
| White et al (2013)              | (56.8±15) years  |                 |               | 84±13                  | 24±11                 | 8±5                    |     | N/A      | N/A                   | N/A                   | N/A                                    | N/A                                              |
| Chan et al (2012)               | (40-83) years    |                 |               | 80±4                   | 55±5                  | 0.2±0.1                |     | 1.2±0.6  | N/A                   | N/A                   | N/A                                    | N/A                                              |
| Walravens et al (2018)          | young            |                 |               | 67±3                   | 58±10                 | 3.4±2.0                |     | N/A      | N/A                   | N/A                   | N/A                                    | N/A                                              |
|                                 | (47-77) years    |                 |               | 88±4                   | 22±3                  | 0.2±0.1                |     |          |                       |                       |                                        |                                                  |
| Kento et al (2007)              | 9 days-77 years  |                 |               | 98.6±0.6               | 68.3±1.2              | 0.8±0.3                |     | 0.5±0.2  | 0.4±0.2               |                       | mice,MI                                | ↑function<br>↑angiogenesis<br>↓volumes           |
| Nakamura et al (2016)           | (2-83) years     |                 |               | 90.7-99                | 14.4-79               | N/A                    |     | N/A      | N/A                   | N/A                   | N/A                                    | N/A                                              |
| Li et al (2012)                 | adult            |                 |               | 99.89                  | 18.4                  | 7.04                   |     | 1        | N/A                   | N/A                   | mice,MI                                | ↑function<br>↓apoptotic cells                    |
| Rajendramair et al (2017)       | adult            |                 |               | 94±1.5                 | 16±1.2                | 6.3±5.8                |     | 1.1±0.3  | 0.67±0.21             |                       | N/A                                    | N/A                                              |
| Cheng et al (2014)              | adult            |                 |               | 97.8±1.7               | 25.1±26.9             | 2.9±2.0                |     | N/A      | 0.2±0.4               |                       | mice,MI                                | ↑function<br>↑myocyte number<br>↓apoptotic cells |
| Harvey et al (2017)             | adult            |                 |               | about 95               | about 55              | about 1                |     | about 1  | about 1               |                       | rat,MI                                 | ↑function<br>↑angiogenesis<br>↓scar size         |

CDCs, cardiosphere derived cells; MI, myocardial infarction; ↑ indicates increase; ↓, decrease.

Supplement Table 2 References:

- Rachana, M. and V. Kalpana, et al. (2011). "Characterization and functionality of cardiac progenitor cells in congenital heart patients." *Circulation* 123 (4): 364-373.
- Shuha, I. and O. Shinichi, et al. (2015). "Intracoronary Autologous Cardiac Progenitor Cell Transfer in Patients With Hypoplastic Left Heart Syndrome: The TICAP Prospective Phase 1 Controlled Trial." *Circulation Research* 116 (4): 653-64.
- Rachel Ruckdeschel, S. and B. Lucio, et al. (2007). "Regenerative potential of cardiosphere-derived cells expanded from percutaneous endomyocardial biopsy specimens." *Circulation* 115 (7): 896-908.
- White, A. J. and R. R. Smith, et al. (2013). "Intrinsic cardiac origin of human cardiosphere-derived cells." *European Heart Journal* 34 (1): 68-75.
- Chan, H. H. L. and Z. M. Homji, et al. (2012). "Erratum to: Human Cardiosphere-Derived Cells from Patients with Chronic Ischaemic Heart Disease Can Be Routinely Expanded from Atrial but Not Epicardial Ventricular Biopsies." *J Cardiovasc Transl Res* 5 (5): 688-688.
- Walravens, A. and M. Vanhaverbeke, et al. (2018). "Molecular signature of progenitor cells isolated from young and adult human hearts." *Scientific Reports* 8 (1): 9266.
- Kento, T. and A. Eishi, et al. (2007). "Human cardiac stem cells exhibit mesenchymal features and are maintained through Akt/GSK-3beta signaling." *Biochem Biophys Res Commun* 352 (3): 635-641.
- Nakamura, T. and T. Hosoyama, et al. (2016). "Influence of aging on the quantity and quality of human cardiac stem cells." *Sci Rep* 6: 22781.
- Li, T. S. and K. Cheng, et al. (2012). "Direct Comparison of Different Stem Cell Types and Subpopulations Reveals Superior Paracrine Potency and Myocardial Repair Efficacy With Cardiosphere-Derived Cells." *Journal of the American College of Cardiology* 59 (10): 942-953.
- Rajendranair, D. S. and J. Karunakaran, et al. (2017). "Differential response of human cardiac stem cells and bone marrow mesenchymal stem cells to hypoxia-reoxygenation injury." *Molecular & Cellular Biochemistry* 425 (1-2): 1-15.
- Cheng, K. and A. Ibrahim, et al. (2014). "Relative roles of CD90 and c-kit to the regenerative efficacy of cardiosphere-derived cells in humans and in a mouse model of myocardial infarction." *Journal of the American Heart Association* 3 (5): e001260-e001260.
- Harvey, E. and H. Zhang, et al. (2017). "Potency of Human Cardiosphere-Derived Cells From Patients With Ischemic Heart Disease Is Associated With Robust Vascular Supportive Ability." *Stem Cells Translational Medicine* 6 (5): 1399-1411.
