# Supplementary material
Source: PubMed Central journal article supplement (PMC6874636)

Article title: Infant cardiosphere-derived cells exhibit non-durable heart protection in dilated cardiomyopathy rats

Journal name: Cytotechnology

Author names: Siyuan Wang, Weidan Chen, Li Ma, Minghui Zhou, Wenyan Dong, Haili Yang, Lei Sun, Xinxin Chen, Jinzhu Duan

Corresponding author: 1. Jinzhu Duan Heart center and institute of pediatrics, Guangzhou Women and Children's Medical Center, Guangzhou Medical University Tel: +86-20-38857729 E-Mail:duanjinzhu@163.com

2. Xinxin Chen Heart center, Guangzhou Women and Children's Medical Center, Guangzhou Medical University Tel: +86-20-38076172 E-Mail: zingerchen@163.com

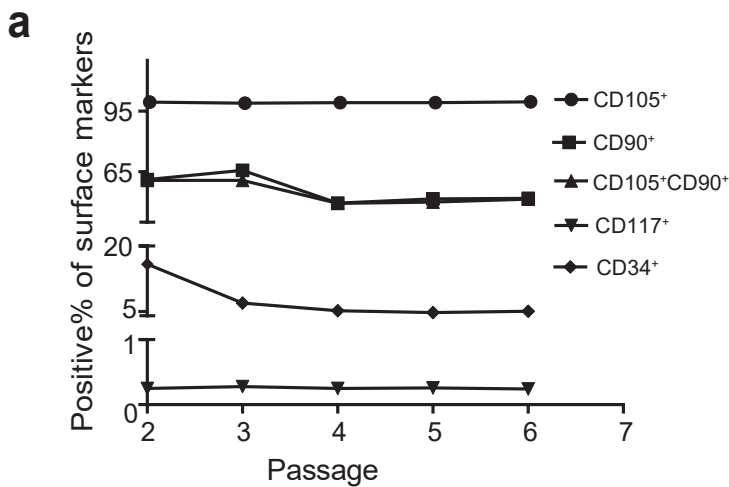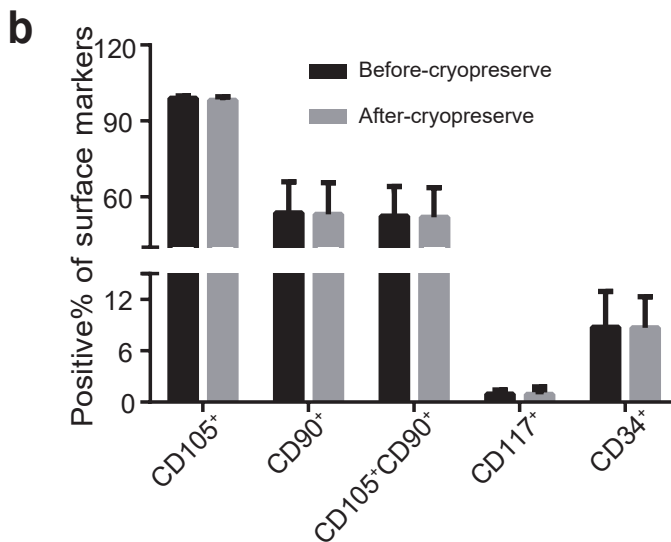

Supplement: 10616_2019_328_MOESM3_ESM.pdf [file 10616_2019_328_MOESM3_ESM.pdf]
